# Supplementary material for: Effect of surface–bulk partitioning on the heterogeneous oxidation of aqueous saccharide aerosols
Source: Royal Society of Chemistry journal article supplement (doi:10.1039/c8cp06785f), 2019-01-01
Supplement: c8cp06785f1.pdf [file c8cp06785f1.pdf]

## Supporting Information

# Effect of surface–bulk partitioning on the heterogeneous oxidation of aqueous saccharide aerosols

Hanyu Fan,<sup>†</sup> Tadini Wenyika Masaya,<sup>†</sup> Fabien Goulay\*

Department of Chemistry, West Virginia University, Morgantown, West Virginia 26506, USA

\*Electronic mail: [Fabien.goulay@mail.wvu.edu](mailto:Fabien.goulay@mail.wvu.edu)

**Author contributions:** H.F. performed the experiments and the initial data analysis. T. W. M. designed, performed and analyzed the molecular dynamics simulations.

Table S1 List of saccharide compounds

| Structure                                                                           | Common Name              | Formula                                         | Molar mass (g mol <sup>-1</sup> ) |
|-------------------------------------------------------------------------------------|--------------------------|-------------------------------------------------|-----------------------------------|
|    | Xylose                   | C <sub>5</sub> H <sub>10</sub> O <sub>5</sub>   | 150.13                            |
|    | Levoglucosan             | C <sub>6</sub> H <sub>10</sub> O <sub>5</sub>   | 162.14                            |
|    | Fructose                 | C <sub>6</sub> H <sub>12</sub> O <sub>6</sub>   | 180.16                            |
|   | Glucose                  | C <sub>6</sub> H <sub>12</sub> O <sub>6</sub>   | 180.17                            |
|  | β-methyl glucopyranoside | C <sub>7</sub> H <sub>14</sub> O <sub>6</sub>   | 194.18                            |
|  | Trehalose                | C <sub>12</sub> H <sub>22</sub> O <sub>11</sub> | 342.30                            |
|  | Melezitose               | C <sub>18</sub> H <sub>32</sub> O <sub>16</sub> | 504.44                            |



**Figure S1** Relative surface-weighted (red dots) and total mass (black dots) for (a) ternary MGP-lactose-water and (b) binary lactose-water aerosols.



**Figure S2.** Surface-weighted particle size distribution for unreacted saccharide containing droplets. Pure lactose droplets (black dashed line): the mean surface-weighted diameter is 361.8 nm, and the total concentration of number particle size is  $2.32 \times 10^5 \text{ #/ cm}^3$ . Equimolar MGP/lactose aqueous droplets (red dashed line): the mean surface-weighted diameter is 365.4 nm, and the total concentration of number particle size is  $2.46 \times 10^5 \text{ #/ cm}^3$ .
